# Supplementary figures and images for: Impact of B7-H3 expression on metastasis, immune exhaustion and JAK/STAT and PI3K/AKT pathways in clear cell renal cell carcinoma
Source: PubMed Central journal article supplement — Oncoimmunology. 2024 Nov 1;13(1):2419686. doi: 10.1080/2162402X.2024.2419686 (PMC11540085; doi:10.1080/2162402x.2024.2419686), 2024-11-01

SUPPLEMENTARY FIGURE 1

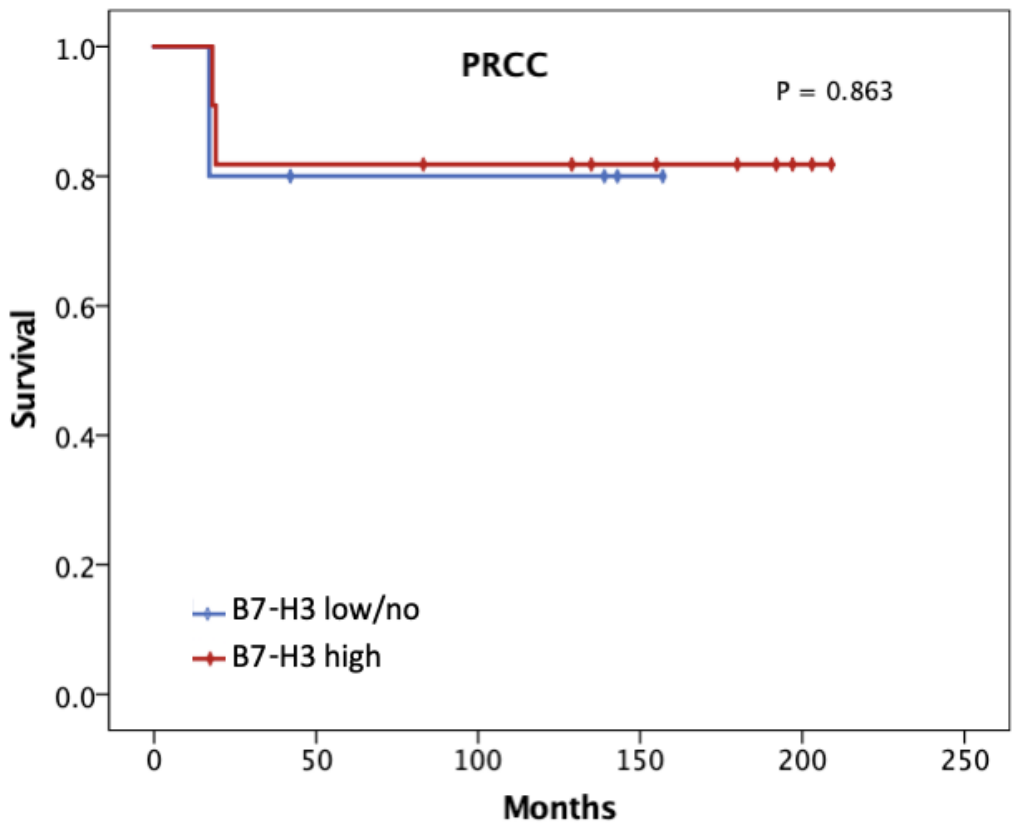

Supplement: KONI_A_2419686_SM2151.pdf [file KONI_A_2419686_SM2151.pdf]
